# Supplementary material for: Contribution of extended family history in assessment of risk for breast and colon cancer
Source: Springer Nature journal article supplement (doi:10.1186/s12875-016-0521-0), 2016-09-01
Supplement: MOESM1 [file 10640588]

FCP# : \_\_\_\_\_

**Family History Questionnaire**  
**Familial Cancer Program Clinic**

Most people have a history of cancer in their families. This is because 1 in 3 people will develop cancer in their lifetime. Familial cancers may be due to inherited genes, a shared environment, or chance. Filling out the following questionnaire will help determine if inherited factors may be playing a role in the development of cancer in your family. Please also list other medical conditions that your relatives have which you feel would be important to know about.

Your name \_\_\_\_\_ Date of Birth \_\_\_\_\_

Address \_\_\_\_\_ Telephone number \_\_\_\_\_

\_\_\_\_\_

Have you ever been diagnosed with cancer?     ( ) Yes   ( ) No

If yes, what type(s) of cancer? \_\_\_\_\_

At what age(s) were you diagnosed? \_\_\_\_\_

**Family History:** Please note whether relatives are living or deceased (L or D)

***Your Immediate Family***

|                  | <b>Total<br/>Number</b> | <b>Number<br/>with<br/>Cancer</b> | <b>Type(s) of cancer</b> | <b>Age(s) at<br/>diagnosis</b> |
|------------------|-------------------------|-----------------------------------|--------------------------|--------------------------------|
| Your daughter(s) |                         |                                   |                          |                                |
| Your son(s)      |                         |                                   |                          |                                |
| Your brother(s)  |                         |                                   |                          |                                |
| Your sister(s)   |                         |                                   |                          |                                |

*Your mother's side of the family*

|                                          | <b>Total<br/>Number</b> | <b>Number<br/>With<br/>Cancer</b> | <b>Type(s) of Cancer</b> | <i>Age(s)<br/>At<br/>Diagnosis</i> |
|------------------------------------------|-------------------------|-----------------------------------|--------------------------|------------------------------------|
| Your mother                              |                         |                                   |                          |                                    |
| Your mother's mother                     |                         |                                   |                          |                                    |
| Your mother's father                     |                         |                                   |                          |                                    |
| Your mother's brother(s)                 |                         |                                   |                          |                                    |
|                                          |                         |                                   |                          |                                    |
| Your mother's sister(s)                  |                         |                                   |                          |                                    |
| Your maternal cousins<br>(first cousins) |                         |                                   |                          |                                    |

What is your mothers ethnic background (country of origin?) \_\_\_\_\_  
 (i.e. English, Irish, French Canadian, African American, Eastern European, Jewish, etc.)

FCP# \_\_\_\_\_

***Your father's side of the family***

|                                          | <b>Total<br/>Number</b> | <b>Number<br/>With<br/>Cancer</b> | <b>Type(s) of Cancer</b> | <b><i>Age(s)<br/>At<br/>Diagnosis</i></b> |
|------------------------------------------|-------------------------|-----------------------------------|--------------------------|-------------------------------------------|
| Your father                              |                         |                                   |                          |                                           |
| Your father's mother                     |                         |                                   |                          |                                           |
| Your father's father                     |                         |                                   |                          |                                           |
| Your father's brother(s)                 |                         |                                   |                          |                                           |
| Your father's sister(s)                  |                         |                                   |                          |                                           |
| Your paternal cousins<br>(first cousins) |                         |                                   |                          |                                           |

What is your fathers ethnic background (country of origin?) \_\_\_\_\_  
 (i.e. English, Irish, French Canadian, African American, Eastern European, Jewish, etc.)

***Other relatives:***

This questionnaire asked you about those relatives most closely related to you. If you have other more distantly related relatives that have been diagnosed with cancer, or have a medical condition you feel would be of importance to us, please list them below. In particular, include those relatives that have been diagnosed with cancer at a young age and/or have been diagnosed with more than one type of cancer.

| <b>Relative's relationship to you<br/>(e.g. niece, nephew, maternal,<br/>paternal, etc.)</b> | <b>Type(s) of cancer</b> | <b>Age(s) at<br/>diagnosis</b> |
|----------------------------------------------------------------------------------------------|--------------------------|--------------------------------|
|                                                                                              |                          |                                |
|                                                                                              |                          |                                |
|                                                                                              |                          |                                |
|                                                                                              |                          |                                |
|                                                                                              |                          |                                |
|                                                                                              |                          |                                |
|                                                                                              |                          |                                |

Have you, or any of your relatives ever had genetic testing or participated in a genetic research study?  
If yes, please explain.

Feel free to add any comments and/or other family medical history you feel would be relevant.

Thank you for taking the time to fill out this questionnaire! All information is kept confidential.

Please return the questionnaire to:

Wendy McKinnon, M.S.  
Genetic Counselor  
Familial Cancer Program  
1 Mill Street, Box B-10  
Burlington, VT 05401  
(802) 658-4310
